# Supplementary material for: Transmission mode of watermelon silver mottle virus by Thrips palmi
Source: PubMed Central journal article supplement (PMC7928467; doi:10.1371/journal.pone.0247500), 2021-03-03
Supplement: pone.0247500.s001.pdf [file pone.0247500.s001.pdf]

**S1 Table . Transmission mode and transmission rate of watermelon silver mottle virus by *Thrips palmi***

| Transmission mode                   | Virus-acquiring instar | Virus-inoculating instar | Transmission rate <sup>a</sup> |         |         | P value <sup>b</sup> |
|-------------------------------------|------------------------|--------------------------|--------------------------------|---------|---------|----------------------|
|                                     |                        |                          | Trial 1                        | Trial 2 | Trial 3 |                      |
| <i>Non-persistent transmission</i>  |                        |                          |                                |         |         |                      |
|                                     | First-instar larva     | First-instar larva       | 0/10                           | 0/10    | 0/10    | 1.0                  |
|                                     | Second-instar larva    | Second-instar larva      | 0/10                           | 0/10    | 0/10    | 1.0                  |
|                                     | Adult                  | Adult                    | 0/10                           | 0/10    | 0/10    | 1.0                  |
| <i>Semi-persistent transmission</i> |                        |                          |                                |         |         |                      |
|                                     | First-instar larva     | First-instar larva       | 0/10                           | 0/10    | 1/10    | 0.29                 |
|                                     | Second-instar larva    | Second-instar larva      | 1/10                           | 1/10    | 0/10    | 0.37                 |
|                                     | Adult                  | Adult                    | 0/10                           | 0/10    | 0/10    | 1.0                  |
| <i>Persistent transmission</i>      |                        |                          |                                |         |         |                      |
|                                     | First-instar larva     | Adult                    | 8/10                           | 7/10    | 8/10    | 0.65                 |
|                                     | First-instar larva     | Second-instar larva      | 0/10                           | 1/10    | 0/10    | 0.29                 |
|                                     | Second-instar larva    | Adult                    | 0/10                           | 0/10    | 1/10    | 0.29                 |
|                                     | Adult                  | Adult                    | 1/10                           | 1/10    | 0/10    | 0.37                 |

<sup>a</sup>The transmission rate was calculated as the ratio of test plants positive for WSMoV examined by RT-PCR assays to total test plants.

<sup>b</sup>Transmission rates among trials were compared using Chi-squared test.
