# Supplementary material for: Transmission mode of watermelon silver mottle virus by Thrips palmi
Source: PubMed Central journal article supplement (PMC7928467; doi:10.1371/journal.pone.0247500), 2021-03-03
Supplement: pone.0247500.s002.pdf [file pone.0247500.s002.pdf]

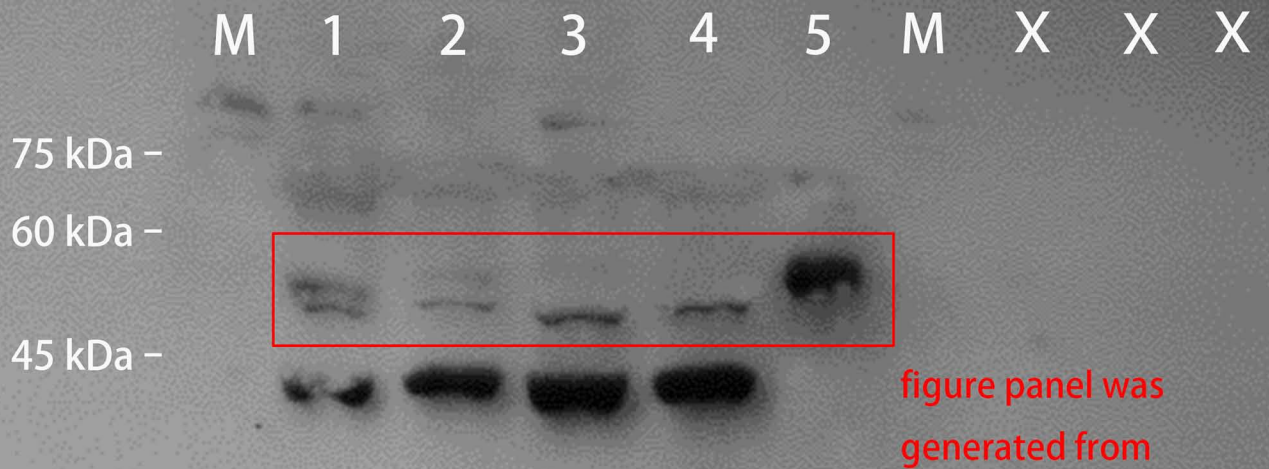

M, Marker

1, 20 viruliferous females

2, 20 viruliferous males

3, 20 non-viruliferous females

4, 20 non-viruliferous males

5, WSMoV-infected watermelon leaf

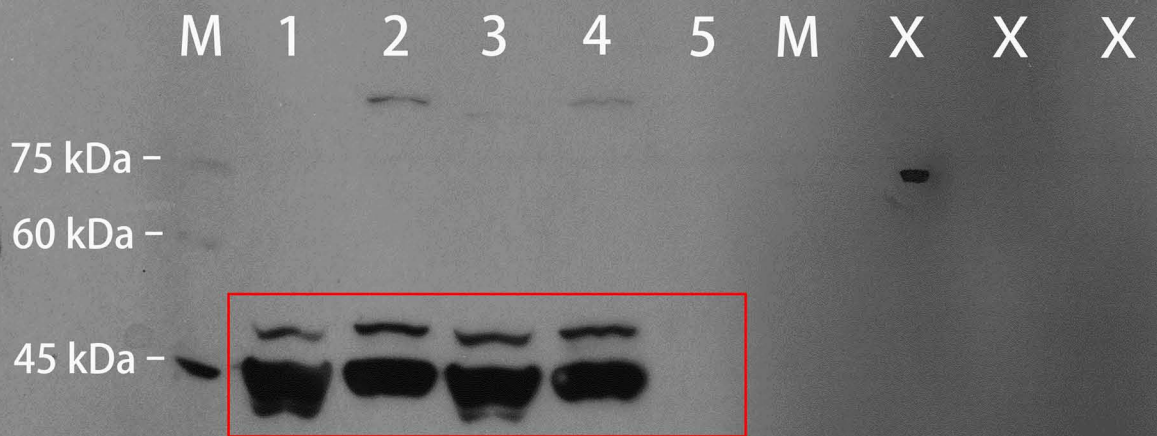

figure panel was  
generated from

M, Marker

1, 20 viruliferous females

2, 20 viruliferous males

3, 20 non-viruliferous females

4, 20 non-viruliferous males

5, WSMoV-infected watermelon leaf
